# Supplementary material for: Atomic view of the HIV-1 matrix lattice; implications on virus assembly and envelope incorporation
Source: PubMed Central journal article supplement — Proc Natl Acad Sci U S A. 2022 Jun 3;119(23):e2200794119. doi: 10.1073/pnas.2200794119 (PMC9191676; doi:10.1073/pnas.2200794119), 2022-06-03
Supplement: pnas.2200794119.sapp.pdf [file pnas.2200794119.sapp.pdf]

SUPPLEMENTAL INFORMATION

**Atomic view of the HIV-1 Matrix lattice. Implications on virus assembly and Env incorporation**

**Alexandra B. Samal, Todd J. Green, and Jamil S. Saad\***

Department of Microbiology, University of Alabama at Birmingham, Birmingham, AL 35294

**Corresponding Author:** Jamil S. Saad, Ph.D.  
Department of Microbiology  
University of Alabama at Birmingham  
845 19<sup>th</sup> Street South, Birmingham, AL 35294  
Phone: (205)-996-9282  
Fax: (205)-996-4008

Email: [saad@uab.edu](mailto:saad@uab.edu)

**Table S1. X-Ray Crystallographic Data Collection and Model Refinement**

| <b>Parameter</b>               |                              |
|--------------------------------|------------------------------|
| Wavelength (Å)                 |                              |
| Resolution range               | 24.9 - 2.15 (2.228 - 2.15)   |
| Space group                    | R 3 2 :H                     |
| Unit cell (Å)                  | 96.56 96.56 216.91 90 90 120 |
| Total reflections              | 130208 (12029)               |
| Unique reflections             | 21434 (2087)                 |
| Multiplicity                   | 6.1 (5.8)                    |
| Completeness (%)               | 99.61 (98.86)                |
| Mean I/sigma(I)                | 21.66 (2.64)                 |
| Wilson B-factor                | 43.02                        |
| R-merge                        | 0.04682 (0.5734)             |
| R-meas                         | 0.05124 (0.6327)             |
| R-pim                          | 0.02045 (0.2634)             |
| CC1/2                          | 0.999 (0.805)                |
| CC*                            | 1 (0.945)                    |
| Reflections used in refinement | 21429 (2088)                 |
| Reflections used for R-free    | 1996 (192)                   |
| R-work                         | 0.183 (0.2700)               |
| R-free                         | 0.236 (0.3500)               |
| CC(work)                       | 0.968 (0.862)                |
| CC(free)                       | 0.953 (0.723)                |
| Number of non-hydrogen atoms   | 2641                         |
| macromolecules                 | 2480                         |
| ligands                        | 77                           |
| solvent                        | 84                           |
| Protein residues               | 308                          |
| RMS(bonds) <sup>a</sup>        | 0.007                        |
| RMS(angles)                    | 0.83                         |
| Ramachandran favored (%)       | 98.01                        |
| Ramachandran allowed (%)       | 1.99                         |
| Ramachandran outliers (%)      | 0.00                         |
| Rotamer outliers (%)           | 4.44                         |
| Clashscore                     | 5.45                         |
| Average B-factor               | 66.27                        |
| macromolecules                 | 65.80                        |
| ligands                        | 87.59                        |
| solvent                        | 60.60                        |
| Number of TLS groups           | 24                           |

Statistics for the highest-resolution shell are shown in parentheses.

<sup>a</sup> RMS, root mean square.

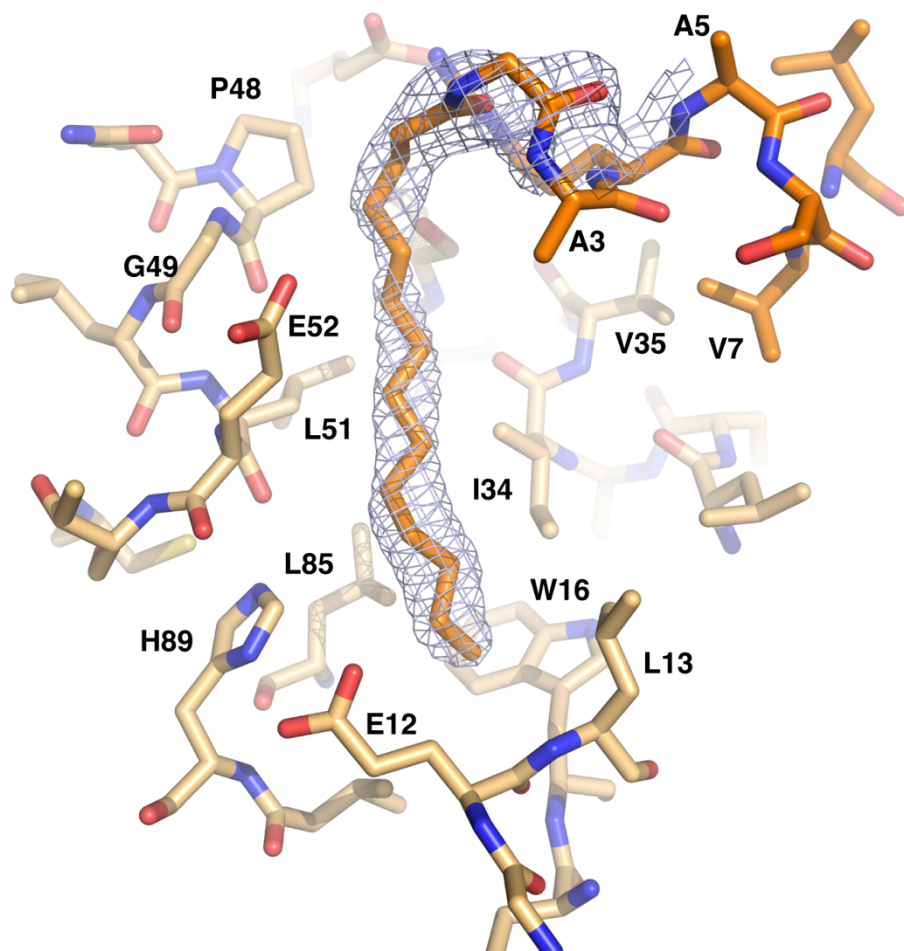

**Figure S1. Close-up view of the myr group and the hydrophobic pocket.** Portions of two myrMA<sub>112</sub> monomers (chain **b**) are shown with orange and light orange carbon backbone, respectively. Electron density (2Fo-Fc, contour level: 1.0 $\sigma$ ) is shown surrounding the myr group.

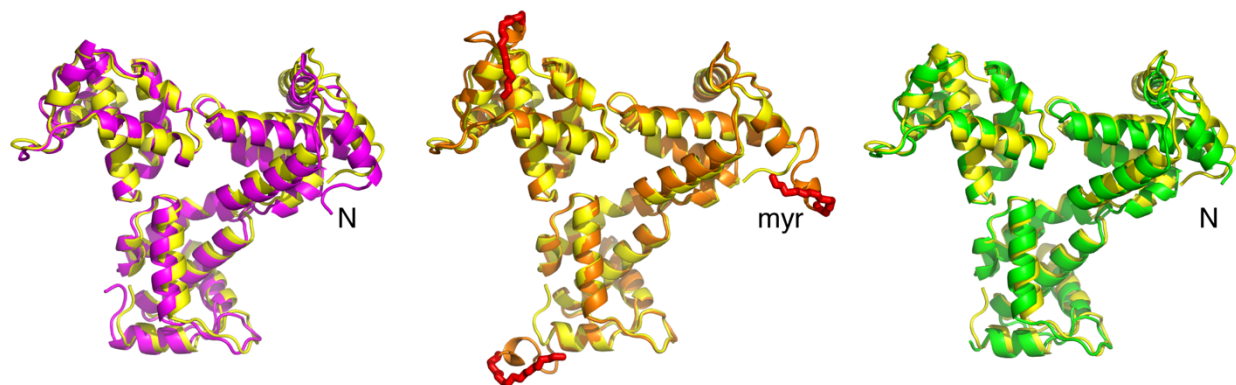

**Figure S2. Comparison of the X-ray structures of HIV-1 myrMA<sub>112</sub> and WT myr(-)MA.** The asymmetric unit of the crystal structure of HIV-1 myrMA<sub>112</sub> contained three copies (chains **a**, **b**, and **c**). Application of crystallographic symmetry revealed three independent trimeric assemblies (chain **a**, magenta; chain **b**, orange; chain **c**, green). Trimers formed by the three independent chains are overlaid on the trimer structure of the WT myr(-)MA protein (yellow; PDB ID: 1HIW) (1). The myr group in chain **b** is shown as red stick. For chains **a** and **c**, the electron density for the myr group as well as residues 2-5 and 2-9, respectively, were not observed likely due to a highly flexible conformation. The structure of the myrMA<sub>112</sub> protein and the trimer arrangement are very similar to the WT myr(-)MA protein.

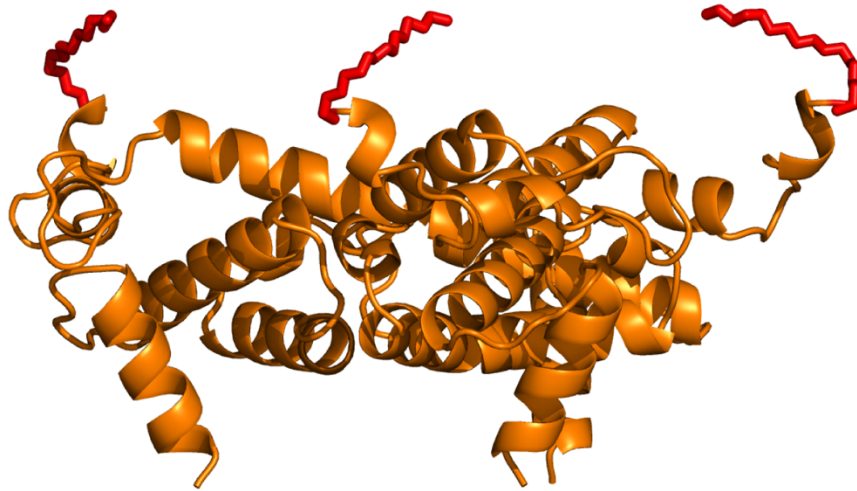

**Figure S3. Structure of the myrMA<sub>112</sub> trimer with the myr group exposed.** Cartoon representation of myrMA<sub>112</sub> trimer **b** with the myr group extruded. The dimer partner involved in myr swapping is not shown. The myr group is shown as a red stick.

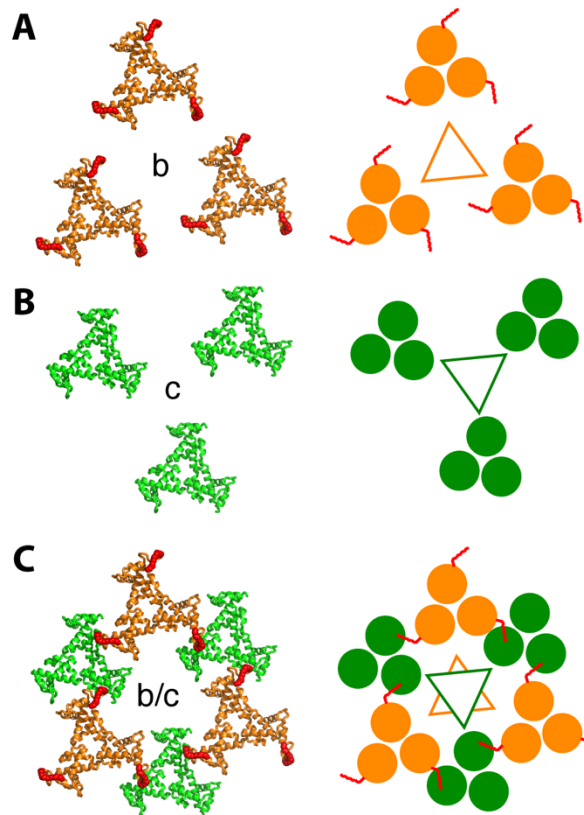

**Figure S4. Organization of the myrMA<sub>112</sub> molecules in the crystal unit.** (A) Trimers formed by chain **b** as spatially arranged in the crystal lattice with myr groups shown in red. Schematic representation illustrating the trimer lattice is shown in orange. (B) Arrangement of chain **c** trimers in the crystal lattice. The center of mass is identical to that shown for (A). (C) Hexamer of trimer lattice formed by packing of **b** and **c** chain trimers. Lattice formation yielded a central hole implicated in accommodation of the gp41CT domain of Env. In this lattice, the myr group is extruded and projecting out-of-plane. All six trimers are in a parallel mode with a three-fold rotation axis, with the N termini of each monomer in the foreground of the image.

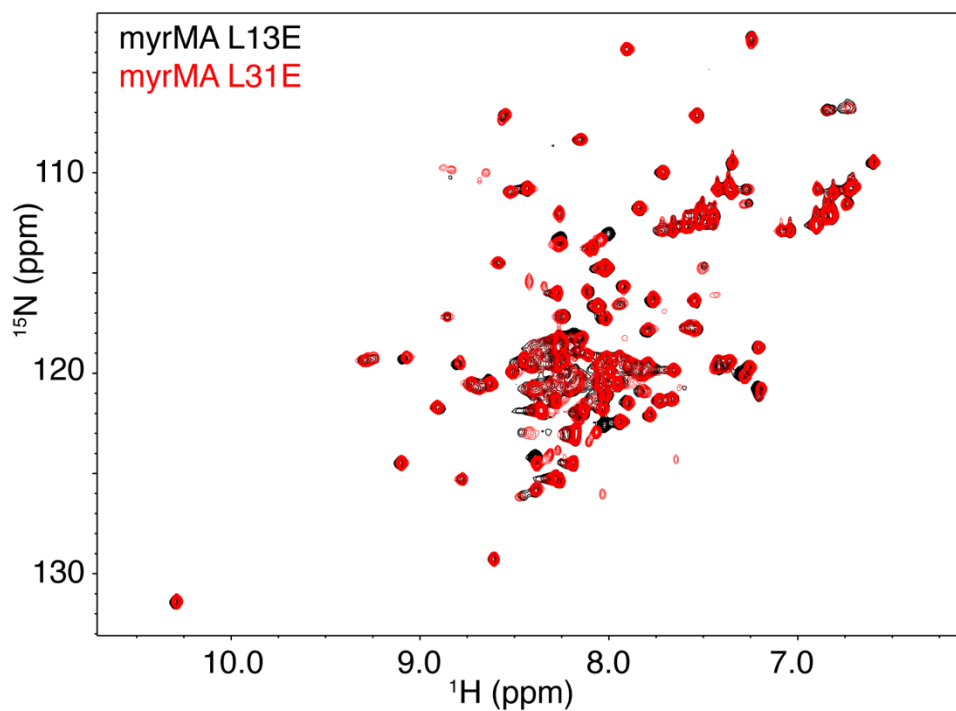

**Figure S5. NMR spectra of myrMA mutants.** Overlay of 2D  $^1\text{H}$ - $^{15}\text{N}$  HSQC spectra for myrMA L13E (black) and L31E (red) at  $120\ \mu\text{M}$  (308 K) in a buffer containing 50 mM sodium phosphates (pH 5.5), 100 mM NaCl, 1 mM EDTA, and 2 mM TCEP. The spectra are nearly identical, suggesting that the mutations induce very similar structural changes in the myrMA protein.

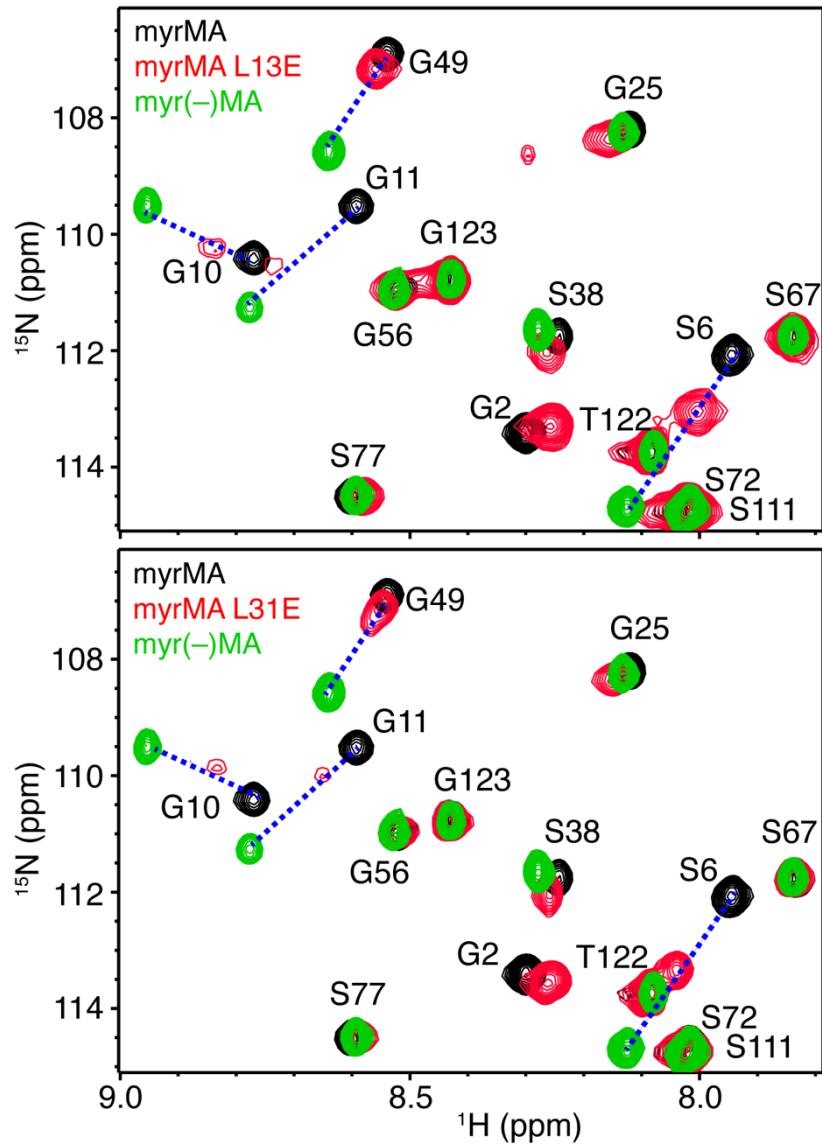

**Figure S6. NMR spectra of WT and mutant myrMA.** Overlay of 2D  $^1\text{H}$ - $^{15}\text{N}$  HSQC spectra for WT (black), myrMA L13E or L31E mutants (red), and myr(-)MA (green) at  $120\ \mu\text{M}$  in a buffer containing 50 mM sodium phosphates (pH 5.5), 100 mM NaCl, 1 mM EDTA, and 2 mM TCEP. For the myrMA L13E and L31E proteins, a subset of  $^1\text{H}$ - $^{15}\text{N}$  resonances shifted toward the corresponding signals of myr(-)MA, indicating a shift in equilibrium towards the myr-exposed state.



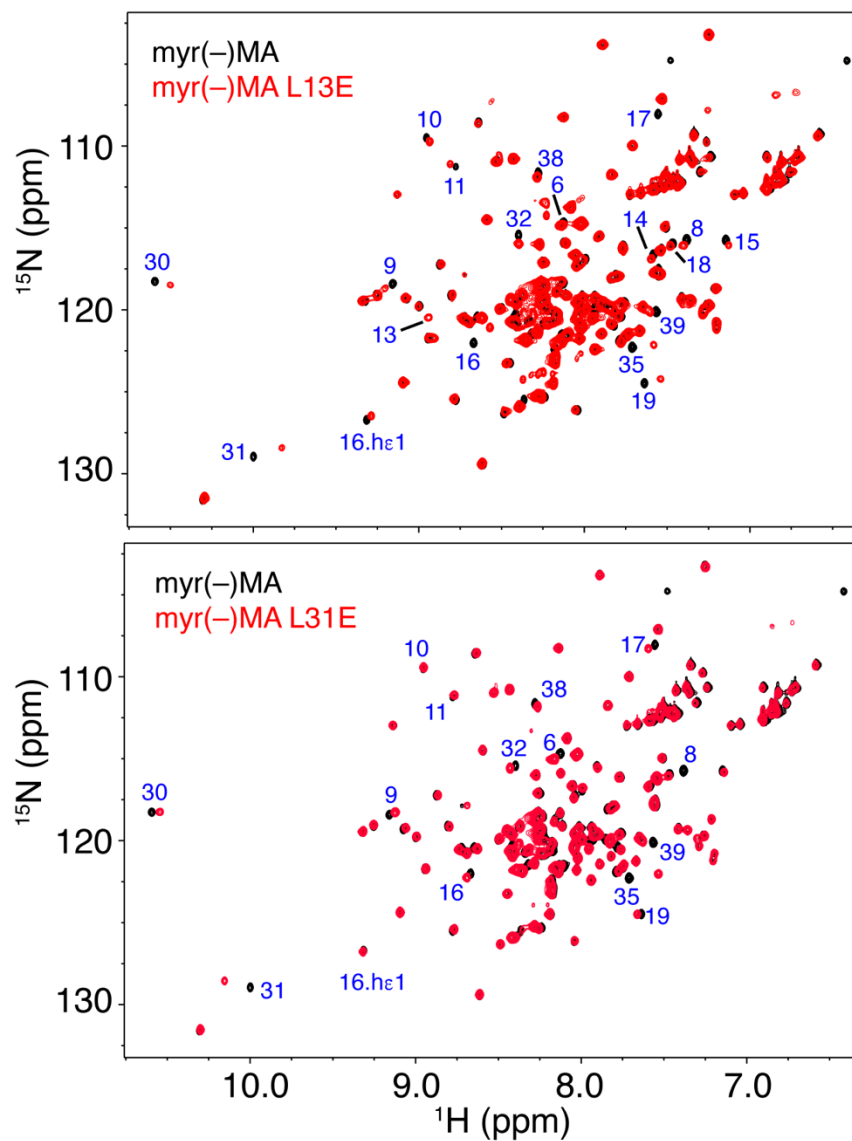

**Figure S7. Comparison of NMR spectra of WT and mutant myr(-)MA.** Overlay of 2D  $^1\text{H}$ - $^{15}\text{N}$  HSQC spectra for WT (black) and mutant (L13E and L31E; red) myr(-)MA proteins collected at 120  $\mu\text{M}$  in a buffer containing 50 mM sodium phosphates (pH 5.5 or 6.0), 100 mM NaCl, 1 mM EDTA and 2 mM TCEP. A subset of  $^1\text{H}$ - $^{15}\text{N}$  resonances corresponding to residues in the N-terminal loop and helices I-II exhibited significant chemical shift changes or severe broadening, indicating a conformational change in these motifs.

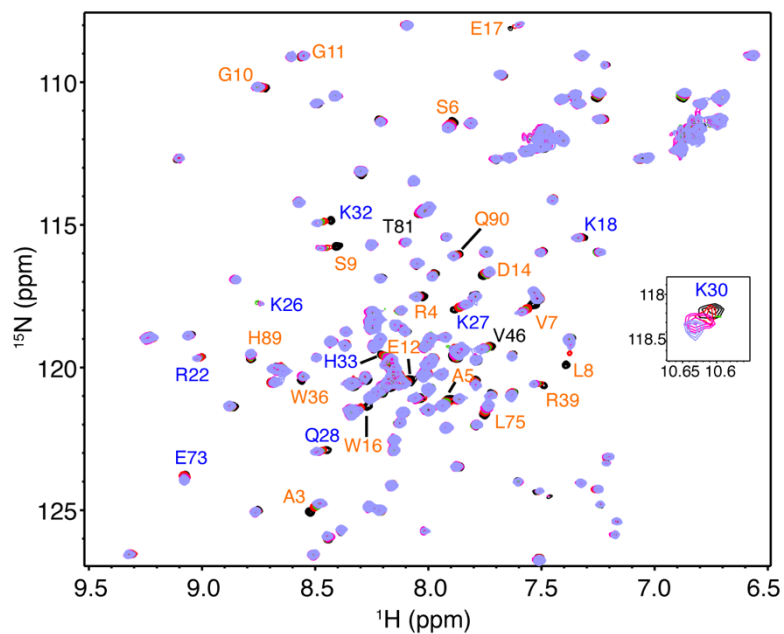

**Figure S8. NMR data of IP<sub>3</sub> binding to myrMA.** Overlay of 2D <sup>1</sup>H-<sup>15</sup>N HSQC spectra upon titration of HIV-1 myrMA with IP<sub>3</sub> [60 μM, 35 °C; IP<sub>3</sub>:myrMA = 0:1 (black), 1:1 (red), 2:1 (green), 4:1 (magenta) and 8:1 (slate)] in 50 mM phosphates (pH 5.5) and 2 mM TCEP. A subset of <sup>1</sup>H-<sup>15</sup>N resonances corresponding to the IP<sub>3</sub> binding site are indicated by blue labels. A second subset of <sup>1</sup>H-<sup>15</sup>N resonances shifted toward the corresponding signals of myr(-)MA (orange labels), indicating that IP<sub>3</sub> binding to myrMA caused a shift in equilibrium towards the myr-exposed state.

## References

1. C. P. Hill, D. Worthylake, D. P. Bancroft, A. M. Christensen, W. I. Sundquist, Crystal Structures of the Trimeric HIV-1 Matrix Protein: Implications for Membrane Association. *Proc. Natl. Acad. Sci.* **93**, 3099-3104 (1996).
